# Supplementary material
Source: PubMed Central journal article supplement (PMC4577418)
Supplement: supp_pp.15.00823_00823suppdata.pdf [file supp_pp.15.00823_00823suppdata.pdf]

# 1 **Supplementary Information**

## 2 **Cultivation of plants**

### 3 **Experiment 1: Induction of gradual phosphorus deficiency in hydroponic plants** 4 **(calibration set)**

5 Barley seedlings were transferred to 32 black 4L containers filled with nutrients dissolved in  
6 double deionized water. Nutrient solutions were changed weekly and aerated using steel medical  
7 syringes. Each container held ten plants fitted in a lid. In all containers, pH was kept constant at  
8  $6.0 \pm 0.3$  using ultrapure HCl. Plants were cultivated in two growth chambers at a 16/8 h  
9 day/night light regime under normal light settings ( $400 \mu\text{mol photons m}^{-2} \text{s}^{-1}$ ) and a constant  
10 temperature ( $20^\circ\text{C}$ ). Ten days after transplanting (DAT) the plants were divided into two groups,  
11 either maintained under the above-mentioned conditions or exposed to an increased light  
12 intensity ( $750 \mu\text{mol photons m}^{-2} \text{s}^{-1}$ ), and a decreased temperature ( $15^\circ\text{C}$ ). The position of all  
13 containers was randomized frequently within each climate chamber to avoid any systematic  
14 effects. The 16 units in each growth chamber were further divided into four different P  
15 treatments including control, P100, P50 and P10. The control nutrient solution contained  $200 \mu\text{M}$   
16  $\text{KH}_2\text{PO}_4$ ,  $200 \mu\text{M}$   $\text{K}_2\text{SO}_4$ ,  $300 \mu\text{M}$   $\text{MgSO}_4 \cdot 7 \text{H}_2\text{O}$ ,  $100 \mu\text{M}$   $\text{NaCl}$ ,  $300 \mu\text{M}$   $\text{Mg}(\text{NO}_3)_2 \cdot 6 \text{H}_2\text{O}$ ,  $900$   
17  $\mu\text{M}$   $\text{Ca}(\text{NO}_3)_2 \cdot 4 \text{H}_2\text{O}$ ,  $600 \mu\text{M}$   $\text{KNO}_3$ ,  $50 \mu\text{M}$   $\text{Fe}(\text{III})\text{-EDTA-Na}$ ,  $2.0 \mu\text{M}$   $\text{H}_3\text{BO}_3$ ,  $0.8 \mu\text{M}$   
18  $\text{Na}_2\text{MoO}_4 \cdot 2 \text{H}_2\text{O}$ ,  $0.7 \mu\text{M}$   $\text{ZnCl}_2$ ,  $1.0 \mu\text{M}$   $\text{MnCl}_2 \cdot 4 \text{H}_2\text{O}$  and  $0.8 \mu\text{M}$   $\text{CuSO}_4 \cdot 5 \text{H}_2\text{O}$ . During the  
19 first week after transplanting the concentration of micronutrients was however reduced by 50%  
20 in order to avoid EDTA poisoning of the young plants. Initially ( $<10$  DAT), P100, P50 and P10  
21 plants were all supplied with  $89 \mu\text{M}$   $\text{KH}_2\text{PO}_4$  to ensure sufficient P supply, while avoiding  
22 luxury uptake. In the following period, the  $\text{KH}_2\text{PO}_4$  concentration was reduced to  $45 \mu\text{M}$  and  $9$   
23  $\mu\text{M}$  for P50 and P10 treatments, respectively. Twelve days after induction of P50 and P10  
24 treatments, *i.e.* 22 DAT, P100, P50 and P10 treatments were deprived completely of P for the  
25 rest of the experimental period.

### 26 **Experiment 2: Induction of gradual phosphorus deficiency in hydroponic plants (validation** 27 **set)**

28 The experiment was carried out in a greenhouse under the same climatic conditions as for pre-  
29 germination of seeds. 16 hydroponic 4L containers were used, each with four barley plants fitted  
30 in the lid. Each container was aerated, the pH kept at  $6.0 \pm 0.3$ , and nutrient solution changed  
31 weekly similar to experiment 1. The first 10 DAT, all containers were provided control nutrient  
32 solution similar to experiment 1. Then four P treatments were induced, control, P100, P50 and  
33 P25, each applied to four cultivation units. P100 and P50 treatments were similar to P100 and  
34 P50 in experiment 1, whereas P25 treated plants received  $22 \mu\text{M}$   $\text{KH}_2\text{PO}_4$ . Furthermore, KCl  
35 was added to ensure a constant potassium concentration for all treatments, depending on the  
36 added amount of  $\text{KH}_2\text{PO}_4$ . 21 DAT, P was completely removed from P100, P50 and P25

37 treatments. At 28 DAT, P was resupplied by providing all containers with control nutrient  
38 solution.

### 39 **Experiment 3: Induction of phosphorus deficiency in soil cultivated plants (validation set)**

40 Experiment 3 was carried out in a greenhouse under the same climatic conditions as experiment  
41 2. The experimental setup consisted of 30 pots, each holding 4.5 kg soil, divided into 6 different  
42 treatments (+P, W3, W4, W5, W6 and -P). The soil was sampled (0-25 cm) from a known P  
43 deficient field (sandy loam: Clay 16%, silt 17% and sand 67%, located at University of  
44 Copenhagen experimental field station, 55° 40' N, 12° 17' E), air-dried and sieved through an 8  
45 mm sieve. All soil received a basic fertilizer containing N (21.5 %), K (10.6 %), S (3.6 %), Mg  
46 (1.0 %) and B (0.02 %) at a rate equivalent to 300 mg N kg<sup>-1</sup>. The soil for the control treatment  
47 (+P) was furthermore fertilized with triple super phosphate (20 % P) at a rate of 0.2 g P kg<sup>-1</sup> soil  
48 prior to plant growth. After pre-germination, nine barley plants were transferred into each pot.  
49 Four days later, this was reduced to seven plants. Three weeks after transplanting, W3 treated  
50 pots received triple super phosphate in the same amount as for the control treatment, by  
51 sprinkling the fertilizer on the soil surface. This procedure was repeated in week 4, 5 and 6 after  
52 transplanting (treatment W4, W5, and W6, respectively). The last treatment (-P) did not receive  
53 any P fertilizer. The soil was kept moist throughout the experiment by irrigation with Milli-Q  
54 water from the top.

### 55 **Experiment 4: Induction of gradual phosphorus deficiency in hydroponic plants (validation 56 set)**

57 Experiment 4 was carried out in a greenhouse under the same climatic conditions as for  
58 experiment 2. 25 hydroponic 4L containers were used, each with four barley plants fitted in the  
59 lid. Each container was aerated, the pH kept at 6.0 ± 0.3, and nutrient solution changed weekly  
60 similar to experiment 1 and 2. Five containers were provided control nutrient solution, while the  
61 remaining 20 containers were provided with P100 solution (89 µM KH<sub>2</sub>PO<sub>4</sub>). 10 DAT, three  
62 treatments were induced from 15 containers initially provided with P100. 3×5 containers each  
63 received 45 µM, 22 µM and 9 µM KH<sub>2</sub>PO<sub>4</sub> (P50, P25, and P10), respectively. KCl was added  
64 correspondingly as in experiment 2. 21 DAT one plant from each cultivation unit was harvested,  
65 and P was completely removed from treatments P100, P50, P25 and P10. Other provided  
66 nutrients were accordingly reduced to ¾ of the original concentration to account for the  
67 harvested plant. At 28 DAT, two plants from each cultivation unit were harvested, and all  
68 containers we provided with the control nutrient solution, adjusted accordingly to supply only  
69 one plant in each unit.

### 70 ***Viridis-zb*<sup>63</sup> – Barley photosystem I mutant**

71 Seeds from the barley-mutant *Viridis-zb*<sup>63</sup> were cultivated in vermiculite in a climate chamber  
72 with short day settings (8/16 hours day/night light regime under low light settings (150 µmol  
73 photons m<sup>-2</sup> s<sup>-1</sup>) and a constant temperature at 20°C). After eight days, the plants were moved for  
74 darkadaption for 16 hours. The plants did only receive Milli-Q water during the experiment.

## 75 **Field experiments**

76 Based on low P availability, 16 locations in Denmark were selected for field trials in the summer  
77 of 2013 and 2014. At each location, 8 plots of 60 m<sup>2</sup> were placed in a randomized experiment.  
78 The entire experiment received a basic fertilizer containing N (21.5 %), K (10.6 %), S (3.6 %),  
79 Mg (1.0 %) and B (0.02 %) in amounts corresponding to 110 kg N ha<sup>-1</sup>. At sowing, 4 plots  
80 received triple superphosphate in amounts corresponding to 30 kg P ha<sup>-1</sup> placed below the seeds,  
81 while the remaining 4 plots received no P fertilizer throughout the growing season. All plots  
82 were sown with spring barley (*Hordeum vulgare* L. cv. Quench), drilled with 300 seeds m<sup>-2</sup>, and  
83 the YFDL was collected 30 days after sowing. At full maturity, 10–30 m<sup>2</sup> from each plot were  
84 harvested and grain yields were recorded. Statistical analysis on grain yields was performed  
85 using the Data Analysis add-in in Microsoft Excel 2010 (Microsoft Corporation, Redmond,  
86 Washington, USA).

## 87 **Historical data**

88 OJIP transients from a range of previously conducted experiments (Hebbern et al., 2009; Husted  
89 et al., 2009; Schmidt et al., 2013) were collected to validate the specificity of the observed effect  
90 on OJIP transients from P deficient plants. The transients were measured on barley (*Hordeum*  
91 *vulgare* L.) and tomato (*Solanum lycopersicum* L.) plants, which were cultivated in hydroponics  
92 under greenhouse conditions comparable to those in experiment 2 and 3. Different nutrient  
93 deficiencies (N, P, K, Ca, S, Mg, Fe, Cu, Zn and B) were induced by removing the single  
94 element from the control nutrient solution noted for experiment 1. OJIP transients were collected  
95 at a time when nutrient deficiencies were expected to be apparent in the plants.

## 96 **Chemometric analysis**

97 PCA is an unsupervised method that enables a simple and comprehensive overview of the major  
98 variations in a multivariate data set by reducing the number of dimensions with a minor loss of  
99 information. Data is presented using the principal components (PC's) as axes, PC 1 explains the  
100 most variance in the dataset, and subsequent PC's explain continuously less variance until only  
101 noise and/or single sample effects are represented by higher PC's. PCA is described more  
102 thoroughly in *e.g.* Martens and Næs, 1989.

103 PLS analysis is related to PCA. However, in PLS the new sets of principal components are  
104 determined to maximize the covariance between measurements (X) and a corresponding set of  
105 reference data, Y. The resulting model can be used for prediction of Y-values using new X-data  
106 as input. The method is further described in *e.g.* Wold et al., 2001.

## 107 **Preprocessing**

108 Before PCA and PLS analysis, the OJIP transients were preprocessed. The measured transients  
109 displayed unwanted variations both within and between individual experiments. These variations  
110 included differences in the maximum fluorescence, the overall slope and offset of the transients  
111 due to both the nature of the fluorescence measurements and the spectroscopic hardware used,  
112 which adjusts detector gain and offset for each individual measurement. As the observed effect  
113 of P deficiency affected the second and higher order components of the OJIP transients, all OJIP

114 transients were initially normalized by  $F_0$  and subtracted by one to have an origin at zero. The  
115 resulting  $F(t)/F_0$  transients were then first-order-corrected to further minimize lower order  
116 variations within and between experiments. This was achieved by calculating an offset- and  
117 multiplicative factor to each individual transient that minimized the difference to the median of  
118 the transients from the control plants in the calibration dataset. This effectively adjusted the  
119 overall offset and slope of all transients and thus made them more comparable, yet did not affect  
120 the second and higher order components of the curves. Mathematically this resembles MSC or  
121 SNV preprocessing (Geladi et al., 1985; Helland et al., 1995). All OJIP transients were  
122 subsequently differentiated by dividing the change in fluorescence with the difference in time  
123 between successive data points. To emphasize the features of the I-P phase of the transient, the  
124 differentiated curve were scaled by a composite exponential function designed to enhance the I-  
125 step of the OJIP transient and subsequently smoothed using a Savitzky-Golay filter (Savitzky  
126 and Golay, 1964), fitting a second order polynomial to a moving window of 15 neighbouring  
127 data points.

128 For the PCA, the full dataset used for the analysis was additionally mean centered to emphasize  
129 variations from the mean OJIP transient over the included dataset of transients from both the  
130 current and previous experiments (Hebberner et al., 2009; Husted et al., 2009; Schmidt et al.,  
131 2013). From experiments 1-4, leaves with a P concentration above  $3000 \mu\text{g g}^{-1}$  DW were marked  
132 as healthy control leaves, and leaves with a P concentration below  $2000 \mu\text{g g}^{-1}$  DW were marked  
133 as P deficient. Leaves between these boundaries ( $2000\text{-}3000 \mu\text{g g}^{-1}$  DW) were not included in  
134 this particular analysis.

135 For the PLS analysis, OJIP transients from experiment 1 were used as calibration dataset, and  
136 OJIP transients from experiment 2, 3 and 4 were used as validation dataset. Leaves from the  
137 same growth unit were pooled in experiment 1, and therefore groups of 5 OJIP transients shared  
138 the same reference value. Due to variations between plants in the same growth unit, some of  
139 these groups of 5 were poorly represented by one common reference value. For this reason, the  
140 root mean squared error (RMSE) for individual transients to the median of the group was  
141 calculated, along with the median average deviation (MAD) between the sum of fluorescence  
142 intensity around the I-step for the 5 transients in a group. The top 10 percentile of the individual  
143 OJIP transients with highest RMSE-values, and the top 15 percentile of the groups of OJIP  
144 transients with the highest MAD-values were not included in the PLS analysis as these were not  
145 well described by the single reference value associated with them. In experiment 4, the reference  
146 value for the plant harvested 21 DAT was used as reference value for all four OJIP transients  
147 measured from the four plants in that growth unit. 28 DAT, a specific reference value was  
148 measured for two of the remaining three plants; the measurement on the last plant was assigned  
149 the mean reference value of the two harvested plants. 31 DAT, a specific reference value was  
150 obtained for the OJIP transient from the single remaining plant in each growth unit.

### 151 **Outlier detection**

152 Data outliers were detected based on interpretations of score plots of the principal components  
153 included in the PCA and PLS analyses, as well as plots showing the Q residuals and Hotelling  $T^2$   
154 parameters for each transient. Q residuals represent the residual between the actual transient and

155 its projection in the principal components of the model; a high Q residual therefor reflects a poor  
156 fit in the model. Hotelling  $T^2$  values arises as a generalization of Student's t-distribution  
157 (Hotelling, 1931), and a high Hotelling  $T^2$  value reflects a sample that has a high leverage in the  
158 model. In these plots, outliers are defined as transients that differ significantly from the majority  
159 of the samples; i.e. transients that plot very separate from other transients in score plots, or  
160 transients with very high Q residual or Hotelling  $T^2$  values.

161 159 OJIP transients from 38 independent growth units were included in the calibration dataset.  
162 Thus, 161 OJIP transients out of 320 total OJIP transients were not included in the development  
163 of the PLS model due to the foliar P concentration of the measured leaves being outside the  
164 included 0-3600  $\mu\text{g P g}^{-1}$  DW range, or because they were data outliers. 291 of 382 OJIP  
165 transients were included in the validation dataset; the excluded samples were identified as data  
166 outliers. For the PCA, 35 OJIP transients were removed from the analysis as outliers, leaving a  
167 total of 1228 OJIP transients in the analysis.

168

## 169 **References**

170 Geladi P, MacDougall D, Martens H (1985) Linearization and Scatter-Correction for Near-Infrared Reflectance Spectra of Meat.  
171 *Applied Spectroscopy* 39: 491–500

172 Hebborn CA, Laursen KH, Ladegaard AH, Schmidt SB, Pedas P, Bruhn D, Schjoerring JK, Wulfsohn D, Husted S (2009) Latent  
173 manganese deficiency increases transpiration in barley (*Hordeum vulgare*). *Physiologia Plantarum* 135: 307–316

174 Helland IS, Næs T, Isaksson T (1995) Related versions of the multiplicative scatter correction method for preprocessing  
175 spectroscopic data. *Chemometrics and Intelligent Laboratory Systems* 29: 233–241

176 Hotelling H (1931) The Generalization of Student's Ratio. *Ann Math Statist* 2: 360–378

177 Husted S, Laursen KH, Hebborn CA, Schmidt SB, Pedas P, Haldrup A, Jensen PE (2009) Manganese Deficiency Leads to  
178 Genotype-Specific Changes in Fluorescence Induction Kinetics and State Transitions. *Plant Physiol* 150: 825–833

179 Martens H, Næs T (1989) *Multivariate Calibration*. John Wiley & Sons

180 Savitzky A, Golay MJE (1964) Smoothing and Differentiation of Data by Simplified Least Squares Procedures. *Analytical*  
181 *chemistry* 36: 1627–1639

182 Schmidt SB, Pedas P, Laursen KH, Schjoerring JK (2013) Latent manganese deficiency in barley can be diagnosed and  
183 remediated on the basis of chlorophyll a fluorescence measurements. *Plant Soil* 372: 417–429

184 Wold S, Sjöström M, Eriksson L (2001) PLS-regression: a basic tool of chemometrics. *Chemometrics and Intelligent Laboratory*  
185 *Systems* 58: 109–130

186

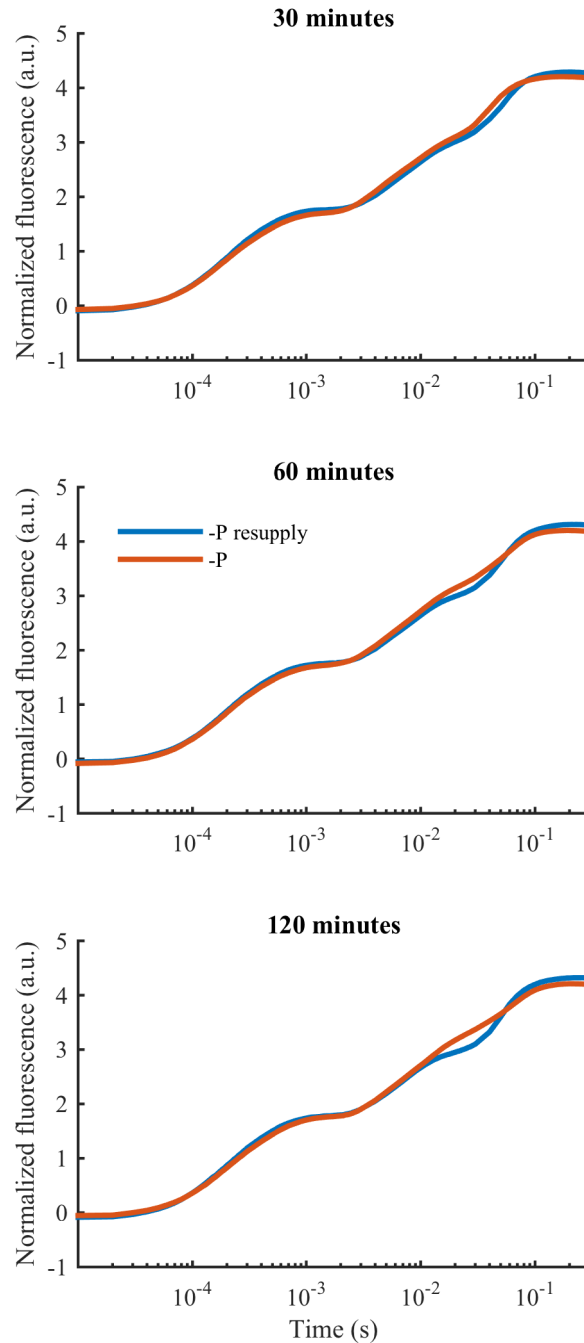

**Figure S1:** OJIP transient of a P deficient barley leaf resupplied with P (-P resupply), and the OJIP transient of a P deficient barley leaf kept in Milli-Q water (-P) after 30, 60 and 120 minutes. It is seen how the I-step is beginning to re-emerge already after 30 minutes, has grown stronger after 60 minutes and appear fully re-established after 120 minutes.

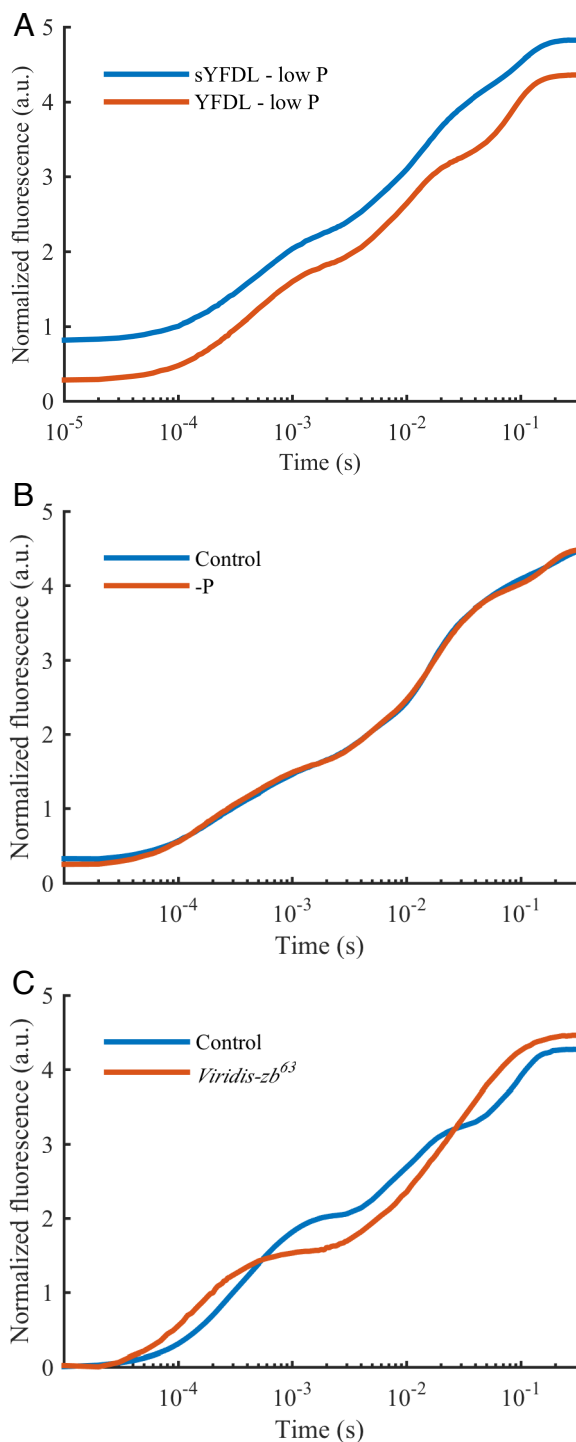

**Figure S2:** OJIP transients probing aspects of the observed effect of P deficiency **A)** OJIP transients from the youngest fully developed leaf (YFDL) and second youngest fully developed leaf (sYFDL) from a barley plant grown under P deficient conditions (YFDL = 1200  $\mu\text{g P g}^{-1}$  DW) 21 days after transplantation. It is evident that while the I-step is still visible in the moderately P deficient YFDL, it has straightened completely in the sYFDL. The sYFDL transient has been offset by 1 arbitrary unit (a.u.) to improve legibility. **B)** The OJIP transients from a healthy control and a P deficient barley plant, when illuminated for 60 seconds with far red light to reduce PSI prior to measuring the OJIP transient. The difference observed between the control and P deficient plants under standard measuring conditions has been completely eliminated. **C)** OJIP transient measured on a *Viridis-zb<sup>63</sup>* mutant compared to a OJIP transient measured from a healthy control plant in experiment 1. Due to the lack of PSI in *Viridis-zb<sup>63</sup>* the plants were extremely stressed, and hence the maximum fluorescence measured were considerably lower than for healthy control plants. However, pre-processing the transients as shown here allows for a comparison of the shape of the transients despite this difference. It was evident that the I-step was completely absent in the OJIP transients from the *Viridis-zb<sup>63</sup>* mutant.

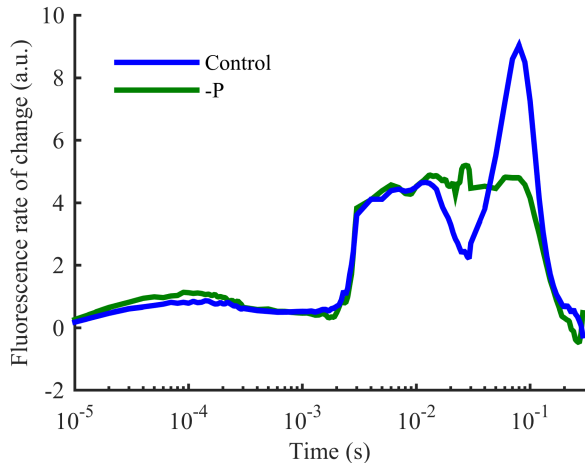

**Figure S3:** Differentiated, scaled and smoothed OJIP transients from barley. The I-step from a healthy control plant is seen as the clear depression at 0.03 s and subsequent large increase compared to the constant rate of change observed for the OJIP transient from the P deficient plant. All transients were similarly pre-processed prior to multivariate analysis.



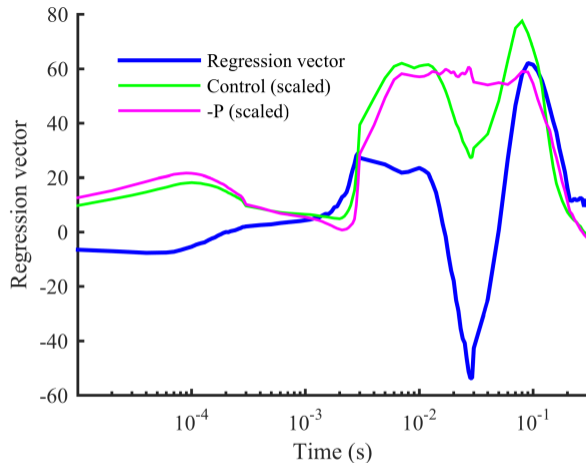

**Figure S4:** Regression vector for PLS model predicting the P concentration. For comparison, the pre-processed OJIP transients for a control and P deficient barley plant is included (scaled to match the amplitude of the regression vector). It is seen that high PLS predictions correspond to a noted I-step depression (at 0.03 s where the regression vector is negative) and subsequent increase.

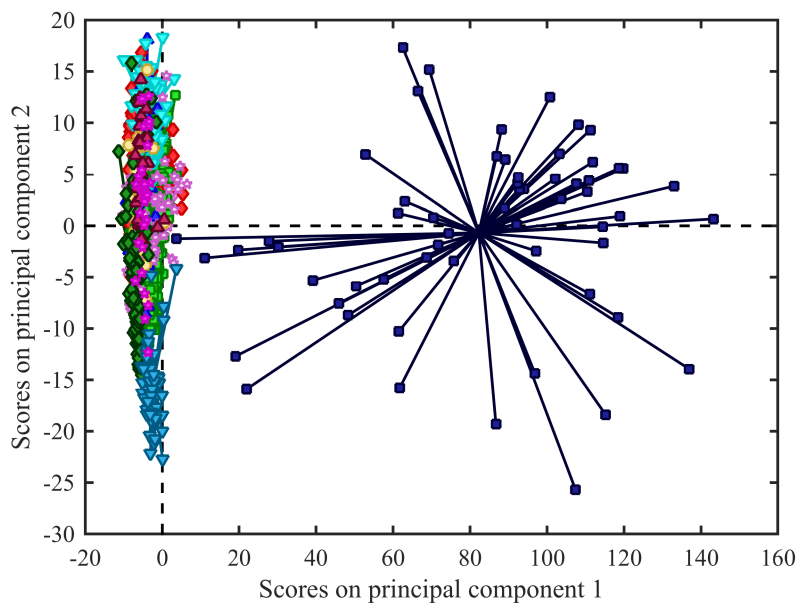

**Figure S5:** Principal components 1-2 (top), 3-4 (middle) and 5-6 (bottom). PC 1 explains 75.4% of the variance, PC 2: 10.0%, PC3: 4.6%, PC4: 3.2 %, PC5: 2.6 % and PC6: 1.8% of the variance. Mn deficiency is seen to dominate the overall OJIP variability seen in the dataset with clear clustering in PC1 scores, but other PC subspaces show clustering of varying strength of P, S, Cu, Fe and Mg.

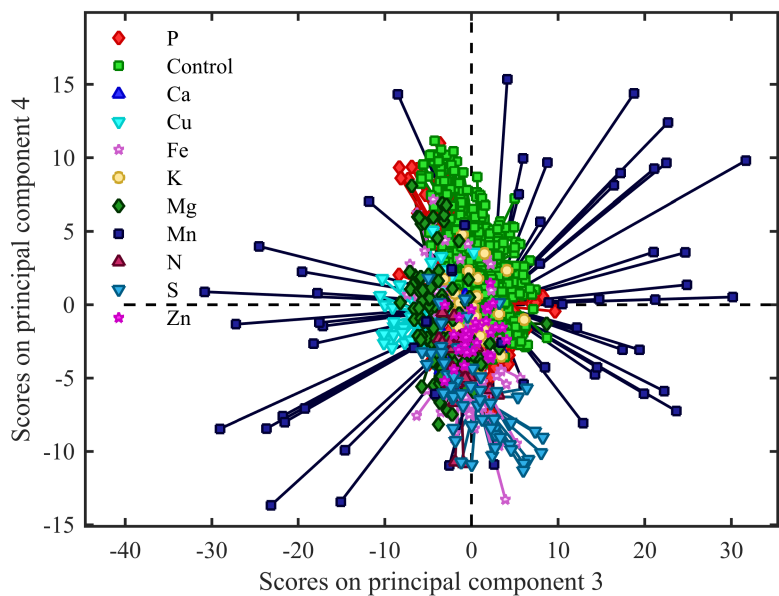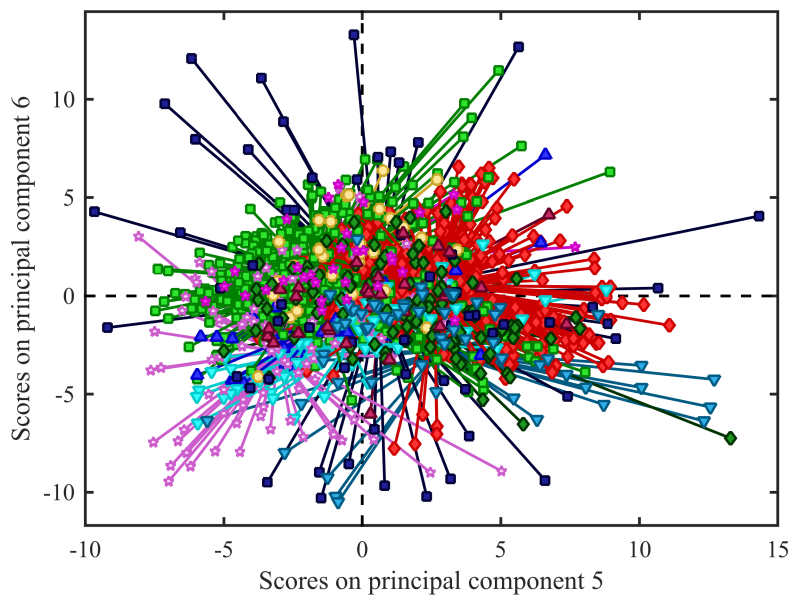

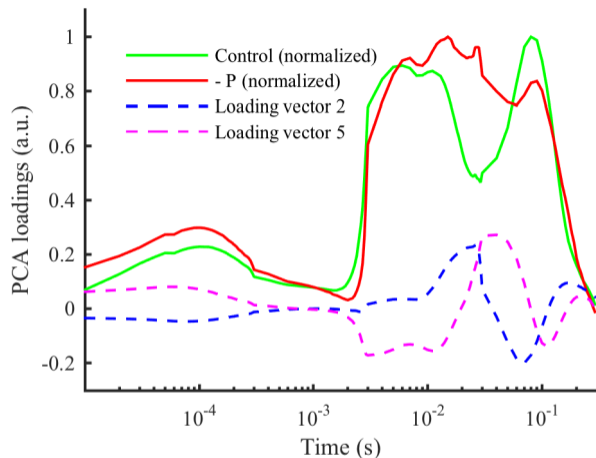

**Figure S6:** PCA loading vectors 2 and 5 plotted together with pre-processed OJIP transients from a control and P deficient barley plant (scaled to a maximum amplitude of 1 for comparison with the loadings vectors). It is evident from the loading vectors that principal components (PC's) 2 and 5 primarily depend on variations in the shape of the I-step. This corroborates the connection between a change in shape of the OJIP transient around the I-step, and plants suffering from P deficiency as the P deficient plants were seen to cluster distinctly from other deficiencies when plotting the scores of PC's 2 and 5. PC 2 explains 10.0 % of the variation, PC 5 explains 2.6% of the variation.

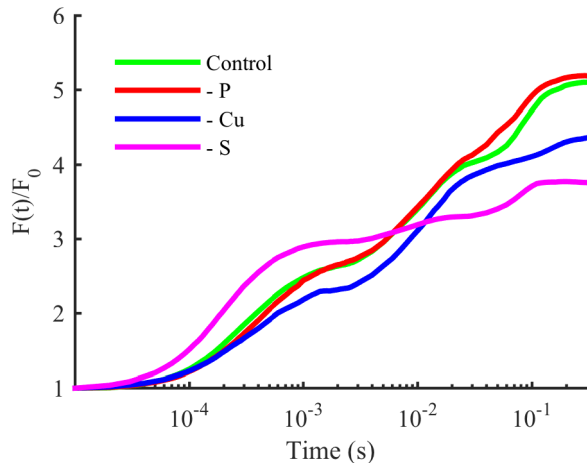

**Figure S7:** Non-processed OJIP transients (normalized by  $F_0$ ) from a control (green) and a P, Cu and S deficient plant (including both barley and tomato plants). It is evident why both P, Cu and S deficient plants are seen to cluster in a score plot of principal components 2 and 5 as all three appear to affect the shape of the OJIP transient at the I-step, but in different ways. Cu deficiency appear to cause a lower overall increase from the I to P step, whereas S deficient plants appear to have a lower increase between J and I, yet a more pronounced I-step compared to even the control plant. While this strongly suggests that Cu and S deficiency can also be predicted based on OJIP transients, it does not appear to interfere with the effect of P on the shape of the OJIP transient.

**Table S1: Elemental concentrations in the YFDL as obtained by ICP-OES. ‘A’ designates normal temperature and light, ‘B’ designates low temperature and high light. P1-P3 indicates decreasing levels of supplied P. W3-W6 indicates weeks where pots were resupplied with P, -P did not receive additional P. In experiment 2, plants were resupplied with P at 28 DAT. The results are average mass concentration in dry matter  $\pm$  standard deviation (n=4 or 5).**

|                                 |         | P (%)           | Ca (%)          | K (%)           | Mg (%)          | S (%)           | Fe ( $\mu\text{g/g}$ ) | Mn ( $\mu\text{g/g}$ ) | Zn ( $\mu\text{g/g}$ ) |              |             |
|---------------------------------|---------|-----------------|-----------------|-----------------|-----------------|-----------------|------------------------|------------------------|------------------------|--------------|-------------|
| Experiment 1 (n=4), hydroponics | 21 DAT  | Control         | 0.72 $\pm$ 0.01 | 0.95 $\pm$ 0.12 | 7.05 $\pm$ 0.28 | 0.40 $\pm$ 0.03 | 0.57 $\pm$ 0.03        | 90 $\pm$ 5             | 70 $\pm$ 15            | 60 $\pm$ 5   |             |
|                                 |         | A               | P1              | 0.37 $\pm$ 0.03 | 1.00 $\pm$ 0.04 | 7.24 $\pm$ 0.45 | 0.41 $\pm$ 0.02        | 0.66 $\pm$ 0.01        | 110 $\pm$ 15           | 100 $\pm$ 5  | 80 $\pm$ 5  |
|                                 |         | P2              | 0.20 $\pm$ 0.01 | 0.84 $\pm$ 0.04 | 7.85 $\pm$ 0.33 | 0.34 $\pm$ 0.02 | 0.54 $\pm$ 0.02        | 100 $\pm$ 10           | 100 $\pm$ 15           | 85 $\pm$ 10  |             |
|                                 |         | P3              | 0.12 $\pm$ 0.01 | 0.49 $\pm$ 0.02 | 8.24 $\pm$ 0.12 | 0.22 $\pm$ 0.01 | 0.42 $\pm$ 0.02        | 80 $\pm$ 5             | 100 $\pm$ 5            | 90 $\pm$ 5   |             |
|                                 |         | B               | Control         | 0.41 $\pm$ 0.04 | 0.63 $\pm$ 0.09 | 4.24 $\pm$ 0.33 | 0.23 $\pm$ 0.02        | 0.44 $\pm$ 0.05        | 60 $\pm$ 5             | 40 $\pm$ 10  | 30 $\pm$ 5  |
|                                 |         | P1              | 0.24 $\pm$ 0.05 | 0.43 $\pm$ 0.10 | 5.12 $\pm$ 0.73 | 0.17 $\pm$ 0.03 | 0.45 $\pm$ 0.08        | 70 $\pm$ 10            | 35 $\pm$ 10            | 50 $\pm$ 10  |             |
|                                 | 28 DAT  | P2              | 0.13 $\pm$ 0.01 | 0.50 $\pm$ 0.08 | 5.83 $\pm$ 0.45 | 0.19 $\pm$ 0.03 | 0.39 $\pm$ 0.05        | 80 $\pm$ 5             | 50 $\pm$ 10            | 60 $\pm$ 5   |             |
|                                 |         | P3              | 0.09 $\pm$ 0.01 | 0.53 $\pm$ 0.04 | 7.71 $\pm$ 0.21 | 0.23 $\pm$ 0.03 | 0.37 $\pm$ 0.01        | 100 $\pm$ 60           | 100 $\pm$ 10           | 105 $\pm$ 30 |             |
|                                 |         | A               | Control         | 0.58 $\pm$ 0.06 | 0.78 $\pm$ 0.18 | 5.53 $\pm$ 0.66 | 0.35 $\pm$ 0.05        | 0.61 $\pm$ 0.05        | 85 $\pm$ 5             | 45 $\pm$ 10  | 45 $\pm$ 10 |
|                                 |         | P1              | 0.16 $\pm$ 0.01 | 0.75 $\pm$ 0.05 | 6.36 $\pm$ 0.36 | 0.35 $\pm$ 0.02 | 0.52 $\pm$ 0.03        | 85 $\pm$ 5             | 75 $\pm$ 10            | 50 $\pm$ 10  |             |
|                                 |         | P2              | 0.11 $\pm$ 0.02 | 0.61 $\pm$ 0.13 | 7.50 $\pm$ 0.20 | 0.28 $\pm$ 0.05 | 0.44 $\pm$ 0.04        | 85 $\pm$ 15            | 80 $\pm$ 20            | 60 $\pm$ 10  |             |
|                                 |         | P3              | 0.06 $\pm$ 0.01 | 0.63 $\pm$ 0.05 | 8.81 $\pm$ 0.38 | 0.30 $\pm$ 0.01 | 0.38 $\pm$ 0.02        | 80 $\pm$ 5             | 130 $\pm$ 20           | 90 $\pm$ 5   |             |
| Experiment 2 (n=4), hydroponics | 21 DAT  | Control         | 0.41 $\pm$ 0.04 | 0.65 $\pm$ 0.21 | 4.67 $\pm$ 0.25 | 0.20 $\pm$ 0.05 | 0.43 $\pm$ 0.10        | 70 $\pm$ 10            | 30 $\pm$ 10            | 30 $\pm$ 5   |             |
|                                 |         | A               | P1              | 0.11 $\pm$ 0.01 | 0.45 $\pm$ 0.11 | 5.76 $\pm$ 0.46 | 0.16 $\pm$ 0.03        | 0.36 $\pm$ 0.05        | 70 $\pm$ 20            | 35 $\pm$ 10  | 40 $\pm$ 10 |
|                                 |         | P2              | 0.09 $\pm$ 0.02 | 0.55 $\pm$ 0.05 | 6.80 $\pm$ 0.46 | 0.18 $\pm$ 0.02 | 0.39 $\pm$ 0.02        | 70 $\pm$ 10            | 55 $\pm$ 5             | 55 $\pm$ 5   |             |
|                                 |         | P3              | 0.06 $\pm$ 0.01 | 0.52 $\pm$ 0.03 | 7.96 $\pm$ 0.37 | 0.24 $\pm$ 0.01 | 0.38 $\pm$ 0.03        | 80 $\pm$ 30            | 100 $\pm$ 5            | 95 $\pm$ 10  |             |
|                                 | 23 DAT  | Control         | 0.62 $\pm$ 0.04 | 1.04 $\pm$ 0.40 | 8.36 $\pm$ 0.45 | 0.46 $\pm$ 0.16 | 0.40 $\pm$ 0.03        | 75 $\pm$ 5             | 160 $\pm$ 100          | 105 $\pm$ 55 |             |
|                                 |         | P1              | 0.54 $\pm$ 0.08 | 1.17 $\pm$ 0.33 | 8.09 $\pm$ 0.57 | 0.51 $\pm$ 0.12 | 0.43 $\pm$ 0.02        | 80 $\pm$ 10            | 215 $\pm$ 85           | 150 $\pm$ 50 |             |
|                                 |         | P2              | 0.21 $\pm$ 0.04 | 1.30 $\pm$ 0.05 | 7.54 $\pm$ 0.40 | 0.58 $\pm$ 0.01 | 0.44 $\pm$ 0.01        | 75 $\pm$ 10            | 250 $\pm$ 25           | 150 $\pm$ 10 |             |
|                                 |         | P3              | 0.12 $\pm$ 0.07 | 0.95 $\pm$ 0.24 | 6.98 $\pm$ 1.62 | 0.44 $\pm$ 0.11 | 0.39 $\pm$ 0.07        | 60 $\pm$ 15            | 190 $\pm$ 60           | 125 $\pm$ 40 |             |
|                                 | 28 DAT  | Control         | 0.70 $\pm$ 0.11 | 0.54 $\pm$ 0.23 | 8.17 $\pm$ 0.32 | 0.28 $\pm$ 0.07 | 0.45 $\pm$ 0.02        | 70 $\pm$ 5             | 65 $\pm$ 25            | 75 $\pm$ 10  |             |
|                                 |         | P1              | 0.44 $\pm$ 0.06 | 0.35 $\pm$ 0.02 | 7.77 $\pm$ 0.18 | 0.21 $\pm$ 0.01 | 0.43 $\pm$ 0.02        | 60 $\pm$ 5             | 50 $\pm$ 5             | 65 $\pm$ 5   |             |
|                                 |         | P2              | 0.24 $\pm$ 0.05 | 0.47 $\pm$ 0.29 | 7.20 $\pm$ 0.91 | 0.23 $\pm$ 0.10 | 0.41 $\pm$ 0.02        | 70 $\pm$ 10            | 80 $\pm$ 45            | 80 $\pm$ 10  |             |
|                                 |         | P3              | 0.12 $\pm$ 0.04 | 0.70 $\pm$ 0.26 | 7.46 $\pm$ 0.24 | 0.32 $\pm$ 0.09 | 0.38 $\pm$ 0.02        | 70 $\pm$ 10            | 120 $\pm$ 30           | 100 $\pm$ 10 |             |
| 30 DAT                          | Control | 0.65 $\pm$ 0.04 | 0.42 $\pm$ 0.08 | 6.05 $\pm$ 0.63 | 0.26 $\pm$ 0.02 | 0.53 $\pm$ 0.04 | 70 $\pm$ 5             | 30 $\pm$ 5             | 65 $\pm$ 25            |              |             |
|                                 | P1      | 0.17 $\pm$ 0.04 | 0.62 $\pm$ 0.15 | 7.11 $\pm$ 0.76 | 0.29 $\pm$ 0.05 | 0.47 $\pm$ 0.06 | 70 $\pm$ 10            | 90 $\pm$ 30            | 70 $\pm$ 15            |              |             |
|                                 | P2      | 0.11 $\pm$ 0.01 | 0.43 $\pm$ 0.16 | 6.40 $\pm$ 0.20 | 0.21 $\pm$ 0.04 | 0.37 $\pm$ 0.04 | 70 $\pm$ 10            | 75 $\pm$ 30            | 65 $\pm$ 15            |              |             |
|                                 | P3      | 0.09 $\pm$ 0.01 | 0.33 $\pm$ 0.08 | 6.65 $\pm$ 0.33 | 0.18 $\pm$ 0.04 | 0.33 $\pm$ 0.02 | 60 $\pm$ 10            | 75 $\pm$ 25            | 75 $\pm$ 10            |              |             |
| Experiment 3 (n=5), soil        | Week 3  | Control         | 0.60 $\pm$ 0.11 | 0.62 $\pm$ 0.27 | 7.10 $\pm$ 0.24 | 0.32 $\pm$ 0.07 | 0.47 $\pm$ 0.03        | 60 $\pm$ 5             | 50 $\pm$ 15            | 65 $\pm$ 25  |             |
|                                 |         | P1              | 0.89 $\pm$ 0.13 | 0.64 $\pm$ 0.22 | 7.64 $\pm$ 0.52 | 0.29 $\pm$ 0.06 | 0.47 $\pm$ 0.04        | 60 $\pm$ 5             | 85 $\pm$ 35            | 70 $\pm$ 20  |             |
|                                 |         | P2              | 1.03 $\pm$ 0.17 | 0.47 $\pm$ 0.12 | 8.00 $\pm$ 0.23 | 0.23 $\pm$ 0.03 | 0.41 $\pm$ 0.02        | 60 $\pm$ 5             | 70 $\pm$ 15            | 70 $\pm$ 10  |             |
|                                 |         | P3              | 1.09 $\pm$ 0.20 | 0.33 $\pm$ 0.07 | 7.73 $\pm$ 0.27 | 0.19 $\pm$ 0.03 | 0.39 $\pm$ 0.03        | 50 $\pm$ 10            | 70 $\pm$ 15            | 80 $\pm$ 15  |             |
|                                 |         | Control         | 0.72 $\pm$ 0.05 | 0.80 $\pm$ 0.08 | 6.78 $\pm$ 0.66 | 0.17 $\pm$ 0.01 | 0.46 $\pm$ 0.01        | 80 $\pm$ 5             | 55 $\pm$ 5             | 45 $\pm$ 5   |             |
|                                 |         | W3              | 0.47 $\pm$ 0.07 | 0.85 $\pm$ 0.15 | 7.27 $\pm$ 0.93 | 0.16 $\pm$ 0.02 | 0.47 $\pm$ 0.05        | 90 $\pm$ 10            | 75 $\pm$ 15            | 60 $\pm$ 10  |             |
|                                 |         | W4              | 0.48 $\pm$ 0.12 | 1.01 $\pm$ 0.22 | 8.02 $\pm$ 1.11 | 0.17 $\pm$ 0.04 | 0.47 $\pm$ 0.04        | 95 $\pm$ 20            | 80 $\pm$ 15            | 70 $\pm$ 10  |             |
|                                 | Week 4  | W5              | 0.40 $\pm$ 0.09 | 1.06 $\pm$ 0.24 | 7.10 $\pm$ 0.74 | 0.17 $\pm$ 0.03 | 0.47 $\pm$ 0.05        | 90 $\pm$ 15            | 80 $\pm$ 15            | 50 $\pm$ 10  |             |
|                                 |         | W6              | 0.60 $\pm$ 0.10 | 0.92 $\pm$ 0.29 | 7.81 $\pm$ 1.46 | 0.19 $\pm$ 0.05 | 0.53 $\pm$ 0.06        | 105 $\pm$ 25           | 80 $\pm$ 15            | 65 $\pm$ 15  |             |
|                                 |         | -P              | 0.51 $\pm$ 0.15 | 0.84 $\pm$ 0.15 | 7.40 $\pm$ 0.82 | 0.17 $\pm$ 0.03 | 0.48 $\pm$ 0.06        | 95 $\pm$ 20            | 70 $\pm$ 10            | 60 $\pm$ 20  |             |
|                                 |         | Control         | 0.71 $\pm$ 0.09 | 1.04 $\pm$ 0.30 | 6.86 $\pm$ 1.06 | 0.22 $\pm$ 0.04 | 0.54 $\pm$ 0.06        | 100 $\pm$ 10           | 90 $\pm$ 20            | 55 $\pm$ 5   |             |
|                                 |         | W3              | 0.47 $\pm$ 0.13 | 1.12 $\pm$ 0.34 | 7.03 $\pm$ 0.67 | 0.19 $\pm$ 0.01 | 0.48 $\pm$ 0.04        | 95 $\pm$ 15            | 120 $\pm$ 30           | 55 $\pm$ 10  |             |
| W4                              |         | 0.39 $\pm$ 0.05 | 0.96 $\pm$ 0.13 | 6.69 $\pm$ 0.59 | 0.17 $\pm$ 0.02 | 0.46 $\pm$ 0.03 | 100 $\pm$ 10           | 105 $\pm$ 10           | 60 $\pm$ 5             |              |             |
| W5                              |         | 0.37 $\pm$ 0.09 | 0.98 $\pm$ 0.25 | 6.84 $\pm$ 0.65 | 0.16 $\pm$ 0.03 | 0.45 $\pm$ 0.04 | 100 $\pm$ 15           | 110 $\pm$ 30           | 55 $\pm$ 10            |              |             |
| Week 5                          | W6      | 0.35 $\pm$ 0.10 | 1.26 $\pm$ 0.16 | 7.93 $\pm$ 0.66 | 0.20 $\pm$ 0.03 | 0.47 $\pm$ 0.03 | 100 $\pm$ 15           | 135 $\pm$ 10           | 60 $\pm$ 10            |              |             |
|                                 | -P      | 0.41 $\pm$ 0.08 | 0.81 $\pm$ 0.11 | 6.68 $\pm$ 0.62 | 0.18 $\pm$ 0.02 | 0.50 $\pm$ 0.03 | 110 $\pm$ 15           | 100 $\pm$ 15           | 65 $\pm$ 10            |              |             |
|                                 | Control | 0.75 $\pm$ 0.16 | 1.75 $\pm$ 0.77 | 4.60 $\pm$ 1.18 | 0.29 $\pm$ 0.09 | 0.58 $\pm$ 0.11 | 110 $\pm$ 25           | 160 $\pm$ 70           | 55 $\pm$ 15            |              |             |
|                                 | W3      | 0.83 $\pm$ 0.07 | 1.50 $\pm$ 0.80 | 5.77 $\pm$ 0.95 | 0.26 $\pm$ 0.04 | 0.56 $\pm$ 0.05 | 110 $\pm$ 10           | 165 $\pm$ 60           | 60 $\pm$ 5             |              |             |
|                                 | W4      | 0.63 $\pm$ 0.26 | 1.20 $\pm$ 0.36 | 5.43 $\pm$ 0.85 | 0.20 $\pm$ 0.03 | 0.48 $\pm$ 0.09 | 90 $\pm$ 20            | 150 $\pm$ 30           | 55 $\pm$ 20            |              |             |
|                                 | W5      | 0.43 $\pm$ 0.05 | 1.02 $\pm$ 0.36 | 6.21 $\pm$ 0.81 | 0.19 $\pm$ 0.03 | 0.53 $\pm$ 0.07 | 90 $\pm$ 15            | 160 $\pm$ 35           | 55 $\pm$ 10            |              |             |
|                                 | W6      | 0.56 $\pm$ 0.12 | 0.71 $\pm$ 0.14 | 6.61 $\pm$ 1.24 | 0.17 $\pm$ 0.03 | 0.51 $\pm$ 0.09 | 105 $\pm$ 15           | 125 $\pm$ 15           | 65 $\pm$ 15            |              |             |
| Week 6                          | -P      | 0.44 $\pm$ 0.08 | 1.00 $\pm$ 0.46 | 6.11 $\pm$ 1.27 | 0.19 $\pm$ 0.05 | 0.47 $\pm$ 0.06 | 90 $\pm$ 30            | 130 $\pm$ 40           | 60 $\pm$ 15            |              |             |
|                                 | Control | 0.50 $\pm$ 0.04 | 0.77 $\pm$ 0.19 | 2.68 $\pm$ 0.39 | 0.15 $\pm$ 0.02 | 0.37 $\pm$ 0.04 | 70 $\pm$ 10            | 70 $\pm$ 20            | 30 $\pm$ 5             |              |             |
|                                 | W3      | 0.53 $\pm$ 0.22 | 1.00 $\pm$ 0.28 | 3.62 $\pm$ 1.48 | 0.17 $\pm$ 0.03 | 0.41 $\pm$ 0.08 | 75 $\pm$ 15            | 110 $\pm$ 35           | 35 $\pm$ 10            |              |             |
|                                 | W4      | 0.47 $\pm$ 0.07 | 0.84 $\pm$ 0.22 | 3.50 $\pm$ 0.33 | 0.16 $\pm$ 0.01 | 0.40 $\pm$ 0.03 | 70 $\pm$ 5             | 100 $\pm$ 15           | 35 $\pm$ 5             |              |             |
|                                 | W5      | 0.63 $\pm$ 0.07 | 1.24 $\pm$ 0.29 | 3.36 $\pm$ 0.41 | 0.17 $\pm$ 0.02 | 0.39 $\pm$ 0.05 | 70 $\pm$ 10            | 170 $\pm$ 50           | 30 $\pm$ 5             |              |             |
|                                 | W6      | 0.18 $\pm$ 0.08 | 1.19 $\pm$ 0.43 | 3.58 $\pm$ 0.58 | 0.15 $\pm$ 0.02 | 0.37 $\pm$ 0.04 | 70 $\pm$ 5             | 155 $\pm$ 40           | 30 $\pm$ 5             |              |             |
|                                 | -P      | 0.16 $\pm$ 0.05 | 1.14 $\pm$ 0.40 | 3.82 $\pm$ 0.52 | 0.17 $\pm$ 0.02 | 0.39 $\pm$ 0.05 | 75 $\pm$ 10            | 155 $\pm$ 50           | 30 $\pm$ 5             |              |             |

**Table S2: Harvest data for experiment 1 which was used as calibration dataset. Biomass data are g fresh weight (FW). ‘A’ designates normal light and temperature conditions; ‘B’ designates high light and low temperature conditions. P1-P3 indicates treatments with decreasing levels of supplied P. The results are average  $\pm$  standard deviation (n=12).**

|        |   | <b>Shoot<br/>(g FW)</b> | <b>Root<br/>(g FW)</b> | <b>Root/Shoot</b> | <b>Tillers</b> | <b>Chlorophyll<br/>(mg/g FW)</b> | <b>Carotenoids<br/>(mg/g FW)</b> |                |
|--------|---|-------------------------|------------------------|-------------------|----------------|----------------------------------|----------------------------------|----------------|
| 21 DAT | A | Control                 | 4.2 $\pm$ 0.8          | 2.2 $\pm$ 0.6     | 0.5            | 4                                | 2.5 $\pm$ 0.1                    | 0.4 $\pm$ 0.02 |
|        |   | P1                      | 3.4 $\pm$ 0.4          | 3.0 $\pm$ 0.7     | 0.9            | 3                                | 2.6 $\pm$ 0.1                    | 0.3 $\pm$ 0.02 |
|        |   | P2                      | 3.0 $\pm$ 0.6          | 2.7 $\pm$ 0.5     | 0.9            | 3                                | 2.4 $\pm$ 0.2                    | 0.3 $\pm$ 0.03 |
|        |   | P3                      | 1.5 $\pm$ 0.3          | 2.4 $\pm$ 0.4     | 1.5            | 2                                | 2.1 $\pm$ 0.2                    | 0.3 $\pm$ 0.02 |
|        | B | Control                 | 4.1 $\pm$ 0.5          | 3.9 $\pm$ 0.8     | 0.9            | 5                                | 2.0 $\pm$ 0.1                    | 0.3 $\pm$ 0.02 |
|        |   | P1                      | 3.6 $\pm$ 0.6          | 3.5 $\pm$ 0.9     | 1.0            | 4                                | 2.0 $\pm$ 0.3                    | 0.3 $\pm$ 0.04 |
|        |   | P2                      | 3.0 $\pm$ 0.4          | 3.6 $\pm$ 0.8     | 1.2            | 3                                | 2.3 $\pm$ 0.2                    | 0.4 $\pm$ 0.02 |
|        |   | P3                      | 2.1 $\pm$ 0.4          | 3.0 $\pm$ 0.6     | 1.4            | 3                                | 1.9 $\pm$ 0.2                    | 0.4 $\pm$ 0.02 |
| 28 DAT | A | Control                 | 9.4 $\pm$ 1.4          | 4.2 $\pm$ 1.3     | 0.5            | 6                                | 2.6 $\pm$ 0.2                    | 0.4 $\pm$ 0.04 |
|        |   | P1                      | 6.0 $\pm$ 0.9          | 3.7 $\pm$ 0.6     | 0.6            | 5                                | 2.7 $\pm$ 0.2                    | 0.4 $\pm$ 0.02 |
|        |   | P2                      | 4.6 $\pm$ 1.0          | 3.4 $\pm$ 0.8     | 0.7            | 4                                | 2.4 $\pm$ 0.2                    | 0.4 $\pm$ 0.03 |
|        |   | P3                      | 2.2 $\pm$ 0.5          | 3.0 $\pm$ 0.4     | 1.4            | 2                                | 2.0 $\pm$ 0.2                    | 0.3 $\pm$ 0.02 |
|        | B | Control                 | 9.8 $\pm$ 2.1          | 6.8 $\pm$ 3.4     | 0.7            | 7                                | 2.3 $\pm$ 0.2                    | 0.4 $\pm$ 0.03 |
|        |   | P1                      | 5.9 $\pm$ 1.0          | 5.0 $\pm$ 2.1     | 0.8            | 6                                | 2.0 $\pm$ 0.2                    | 0.4 $\pm$ 0.04 |
|        |   | P2                      | 4.4 $\pm$ 0.9          | 5.4 $\pm$ 1.2     | 1.2            | 5                                | 1.9 $\pm$ 0.1                    | 0.4 $\pm$ 0.04 |
|        |   | P3                      | 2.3 $\pm$ 0.4          | 3.2 $\pm$ 0.6     | 1.4            | 3                                | 1.7 $\pm$ 0.1                    | 0.3 $\pm$ 0.02 |

Table S3: Results of field trials performed at 16 different locations in Denmark over two consecutive years. Average P concentrations (% in dry matter) at day 30 of the YFDL are shown for plots where no P fertilizer was added (-P), and plots where P fertilizer was added corresponding to 30 kg P ha<sup>-1</sup> placed below the seeds (+P). Relative grain yield shows the yield of the -P treatment relative to the grain yield from plots that received P fertilizer. A significant (P<0.05) decrease in relative grain yield is observed for the locations highlighted in bold font. For these locations, the P concentration in the YFDL for the -P treatment is ≤0.20%. At location DK 1, no yields loss is observed despite a P concentration <0.20%, this indicates that P is not the limiting nutrient. No consistent reduction in relative yield is observed for leaf P concentrations above 0.23% in the YFDL. (n=4 except for those marked with †, here n=3).

| Location    | P in YFDL (-P)<br>day 30 (%) | P in YFDL (+P)<br>day 30 (%) | Relative<br>grain yield |
|-------------|------------------------------|------------------------------|-------------------------|
| DK 1        | 0.18±0.02                    | 0.24±0.04 <sup>†</sup>       | 1.00±0.06               |
| <b>DK 2</b> | <b>0.20±0.01</b>             | <b>0.24±0.01</b>             | <b>0.92±0.04</b>        |
| DK 3        | 0.32±0.02                    | 0.48±0.02                    | 1.00±0.08               |
| DK 4        | 0.28±0.10 <sup>†</sup>       | 0.39±0.05                    | 1.02±0.05               |
| <b>DK 5</b> | <b>0.16±0.03</b>             | <b>0.31±0.03</b>             | <b>0.86±0.11</b>        |
| <b>DK 6</b> | <b>0.15±0.07</b>             | <b>0.26±0.02</b>             | <b>0.81±0.10</b>        |
| DK 7        | 0.33±0.02                    | 0.36±0.02                    | 0.99±0.07               |
| DK 8        | 0.25±0.01                    | 0.27±0.02                    | 0.95±0.08               |
| DK 9        | 0.26±0.02                    | 0.34±0.04                    | 0.96±0.07               |
| DK 10       | 0.30±0.03                    | 0.35±0.02                    | 0.95±0.08               |
| DK 11       | 0.43±0.06                    | 0.43±0.05                    | 1.01±0.05               |
| DK 12       | 0.23±0.02                    | 0.28±0.01                    | 0.98±0.02               |
| DK 13       | 0.26±0.04                    | 0.24±0.01                    | 0.98±0.05               |
| DK 14       | 0.42±0.04                    | 0.49±0.03                    | 0.93±0.07               |
| DK 15       | 0.43±0.02                    | 0.45±0.03                    | 1.01±0.04               |
| DK 16       | 0.42±0.01                    | 0.42±0.12                    | 0.96±0.06               |
